# Supplementary material for: Doxorubicin-reinforced supramolecular hydrogels of RGD-derived peptide conjugates for pH-responsive drug delivery
Source: Royal Society of Chemistry journal article supplement (doi:10.1039/c9ob00046a), 2019-01-01
Supplement: c9ob00046a1.pdf [file c9ob00046a1.pdf]

Electronic Supporting Information (ESI)

## Doxorubicin-reinforced supramolecular hydrogels of RGD-derived peptide conjugates for pH-responsive drug delivery

Leixia Mei,<sup>a‡</sup> Keming Xu,<sup>ab‡</sup> Ziran Zhai,<sup>a</sup> Suyun He,<sup>a</sup> Tingting Zhu,<sup>a</sup> Wenying Zhong<sup>\*ab</sup>

<sup>a</sup>Department of Chemistry, China Pharmaceutical University, Nanjing, P. R. China.

<sup>b</sup>Key Laboratory of Biomedical Functional Materials, China Pharmaceutical University, Nanjing 210009, P. R. China.

<sup>‡</sup>These authors contributed equally to the work. \*E-mail: [wyzhong@cpu.edu.cn](mailto:wyzhong@cpu.edu.cn)

### Table of Content

**Figure S1.** The chemical structure of 1-RGD.

**Figure S2.** The chemical structure of 1-RGDH.

**Figure S3.** The chemical structure of 1-RGDHH.

**Figure S4.** HPLC elution curve of 1-RGD.

**Figure S5.** HPLC elution curve of 1-RGDH.

**Figure S6.** HPLC elution curve of 1-RGDHH.

**Figure S7.** <sup>1</sup>HNMR spectrum of 1-RGD (300 MHz, DMSO).

**Figure S8.** <sup>1</sup>HNMR spectrum of 1-RGDH (300 MHz, DMSO).

**Figure S9.** <sup>1</sup>HNMR spectrum of 1-RGDHH (300 MHz, DMSO).

**Figure S10.** TOF-MS spectrum of 1-RGD.

**Figure S11.** TOF-MS spectrum of 1-RGDH.

**Figure S12.** TOF-MS spectrum of 1-RGDHH.

**Figure S13.** TEM images of 1-RGDH solution (1-RGDH, 0.1 wt.%; DOX, 0.1 equiv.) at pH 6.5 (A) and pH 5.5 (B). Bar, 200 nm.

**Figure S14.** Optical images of the 1 wt.% 1-RGDH/DOX hydrogel before (A) and after addition of 0.4M imidazole (B), histidine (C) and EDTA (D).

**Figure S15.** Optical images of the 1 wt.% 1-RGDH/DOX with 0 (A), 0.5 (B), 1 (C), and 2 (D) mol/L of NaCl.

**Figure S16.** Cumulative release of doxorubicin from hydrogels at different concentration of NaCl (1-RGDH, 1 wt.%; DOX, 0.1 equiv.)

**Figure S17.** Optical images of the 1 wt.% RGD solution with 0.1. equiv. DOX.

**Figure S18.** Zeta potentials of 1-RGDH solution (1-RGDH, 0.05 wt.%; DOX, 0.1 equiv.) at pH 7.4, 6.5 and 5.5.

**Figure S19.** Storage moduli ( $G'$ ) and loss moduli ( $G''$ ) of 1-RGDH hydrogel with varying ratio of DOX (1-RGDH: 1 wt.%; 0 - 0.1 equiv. DOX).

**Figure S20.** Dynamic frequency sweep of 1-RGDH hybrid hydrogels (1-RGDH: 1 wt.%; with 0.1 equiv. DOX).

**Figure S21.** Subcutaneous injections of 1 wt.% 1-RGDH/DOX hydrogel (0.1 equiv. DOX) (A) and DOX solution(B).

**Figure S22.** Cell viabilities of MCF-7 (A) and HeLa (B) after treatment of 1-RGDH with DOX or DOX alone for 48 h.

**Figure S23.** The CMC value of 1-RGDH/DOX hydrogel (1-RGDH: 1 wt.%; with 0.1 equiv. DOX).

**Figure S24.** Confocal laser scanning microscopy (CLSM) images of A549 cells with incubation of aqueous solution of DOX at 37 °C or 4 °C. Red, DOX stain; blue, DAPI stain for cell nuclei. Bar, 20  $\mu$ m.

**Table S1.** Table of parameters of Ritger-Peppas models for drug release behavior of DOX/1-RGDH hydrogel at varying pH conditions.

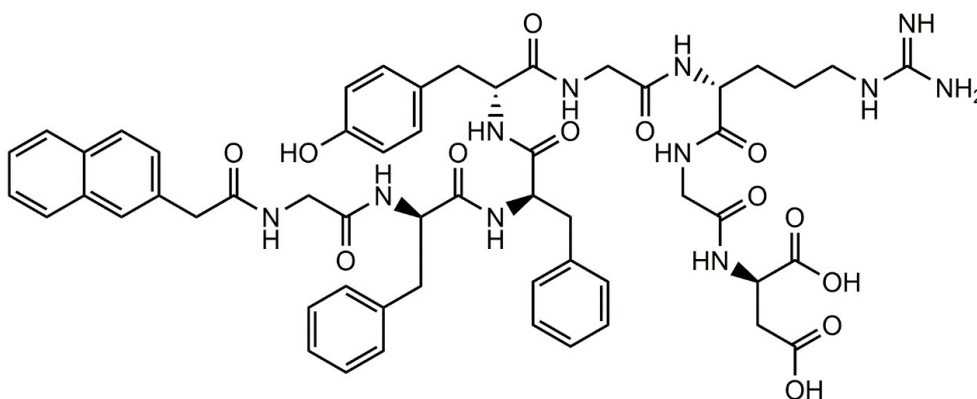

**Figure S1.**The chemical structure of 1-RGD.

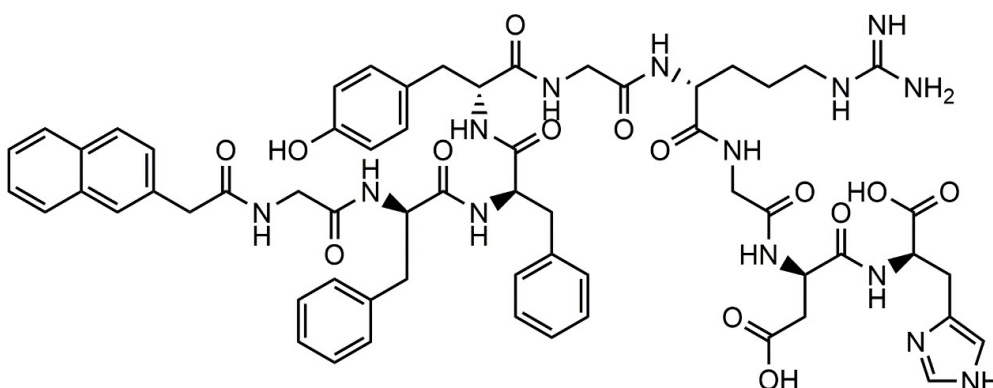

**Figure S2.**The chemical structure of 1-RGDH.

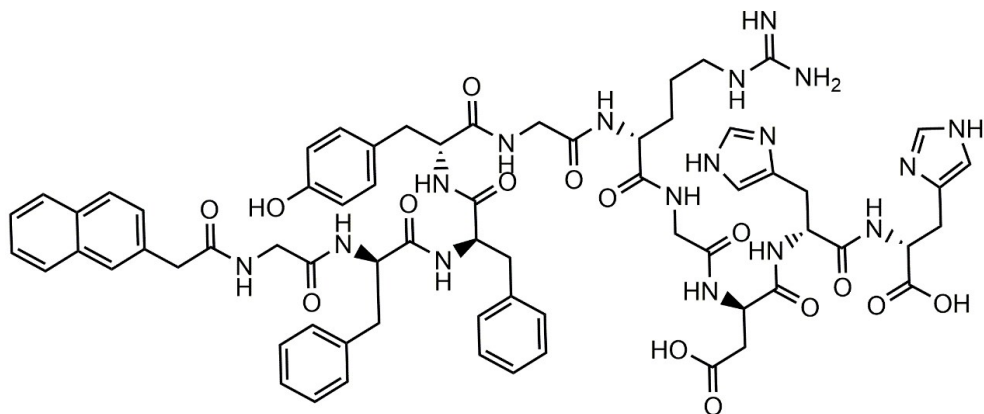

**Figure S3.** The chemical structure of 1-RGDHH.

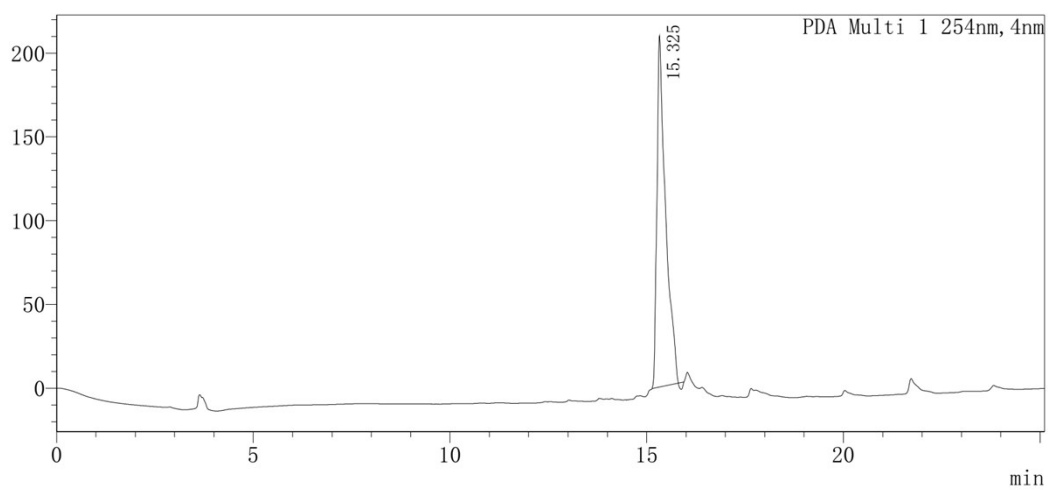

**Figure S4.** HPLC elution curve of 1-RGD.

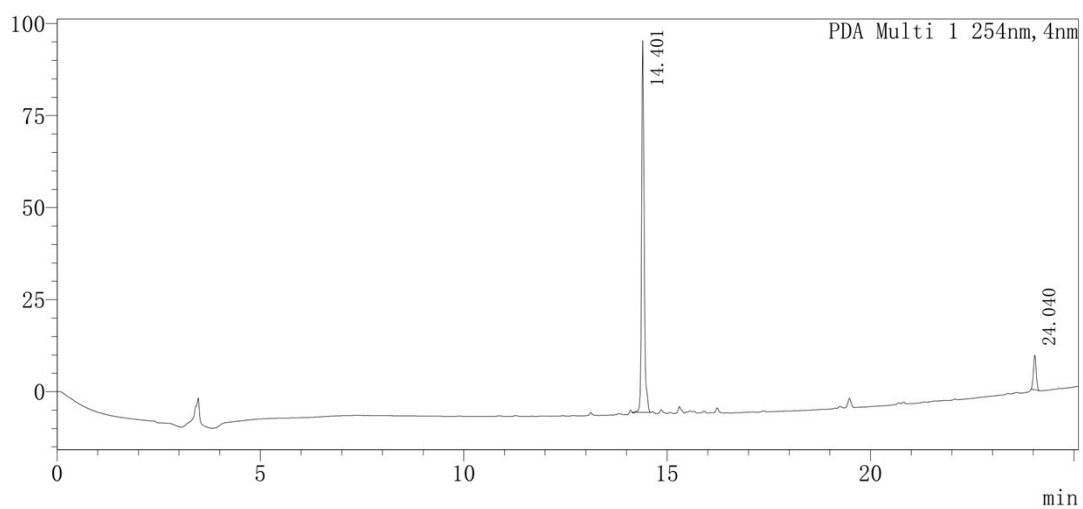

**Figure S5.** HPLC elution curve of 1-RGDH.

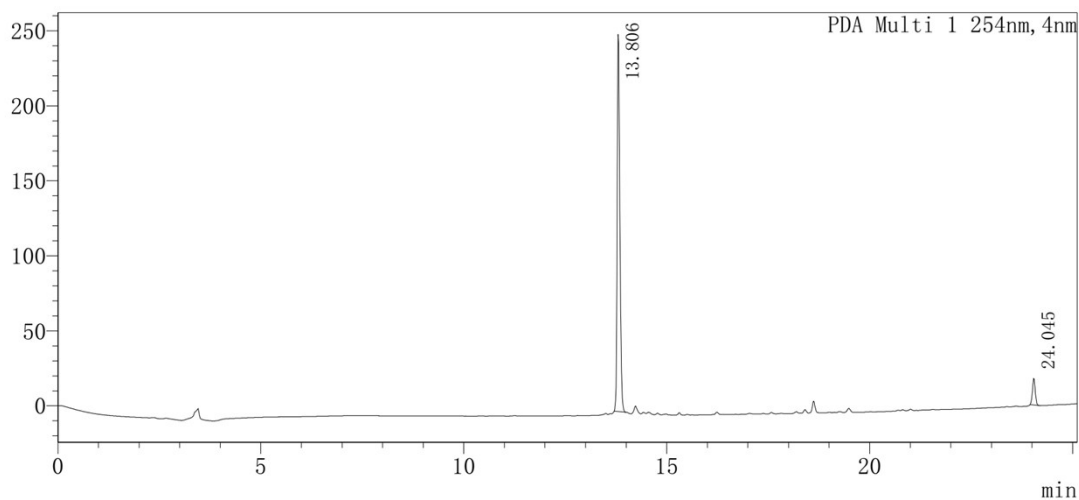

**Figure S6.** HPLC elution curve of 1-RGDH.

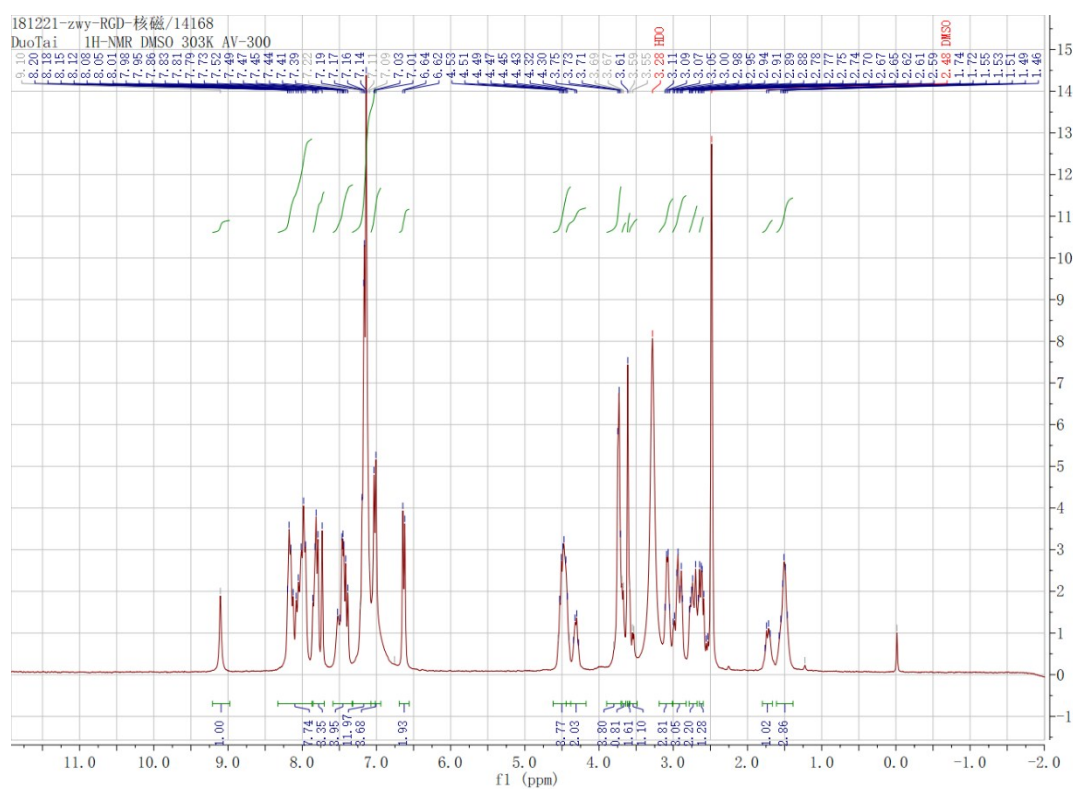

**Figure S7.**  $^1\text{H}$ NMR spectrum of 1-RGD (300 MHz, DMSO).

$^1\text{H}$  NMR (300 MHz, DMSO)  $\delta$  9.19 (s, 1H), 8.20 – 7.88 (m, 8H), 7.86 – 7.73 (m, 3H), 7.60-7.30 (m, 4H), 7.25 – 7.10 (m, 12H), 7.06-6.96 (d,  $J$  = 8.3 Hz, 4H), 6.66 (d,  $J$  = 8.3 Hz, 2H), 4.57 – 4.41 (m, 4H), 4.31 (d,  $J$  = 6 Hz, 2H), 3.74 (dd,  $J$  = 6, 12 Hz, 4H), 3.68 (s, 1H), 3.62 (s, 2H), 3.54 (d,  $J$  = 6 Hz, 1H), 3.08 (d,  $J$  = 6 Hz, 3H), 2.92 (ddd,  $J$  = 6, 6, 3 Hz, 3H), 2.71 – 2.69 (m, 2H), 2.65 – 2.61 (m, 1H), 1.80 – 1.67 (m, 1H), 1.52 (dd,  $J$  = 13.7, 8.5 Hz, 3H)

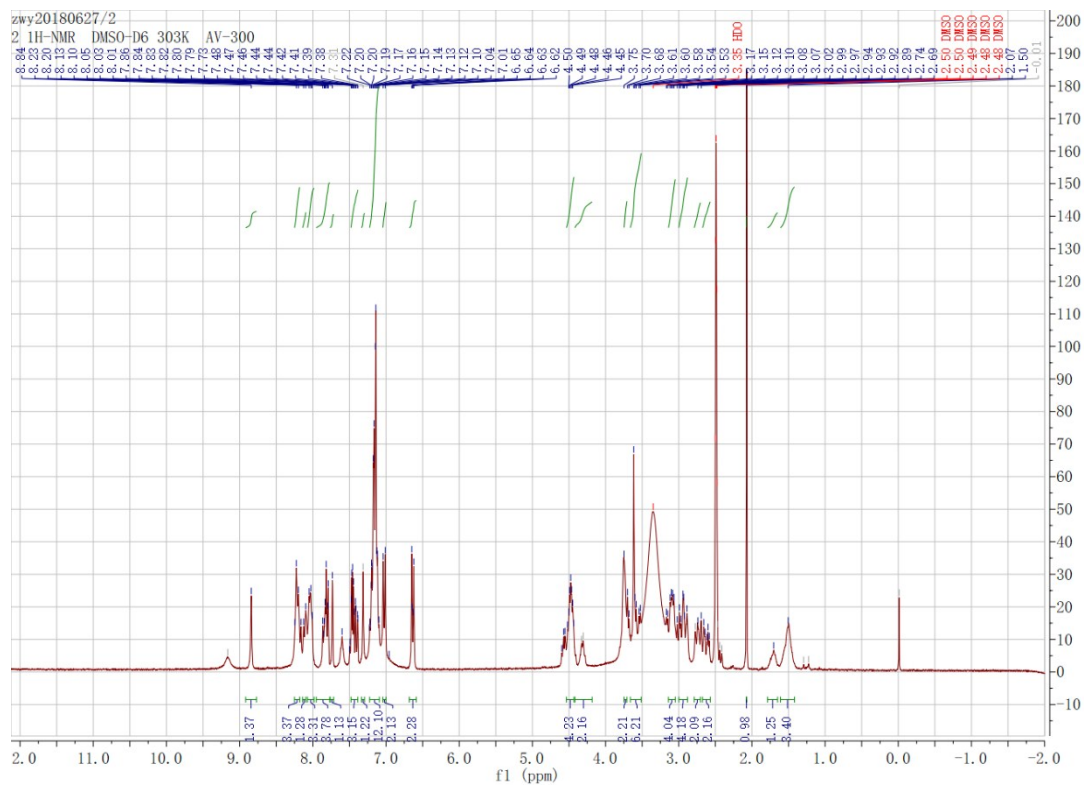

**Figure S8.** <sup>1</sup>HNMR spectrum of 1-RGDH (300 MHz, DMSO).

<sup>1</sup>H NMR (300 MHz, DMSO) δ 8.84 (s, 1H), 8.25-8.20 (m, 3H), 8.13-8.09 (m, 1H), 8.05-8.01 (m, 3H), 7.87-7.79 (m, 4H), 7.73 (s, 1H), 7.50-7.44 (m, 3H), 7.31 (s, 1H), 7.23-7.10 (m, 12H), 7.03 (d, J = 9 Hz, 2H), 6.65-6.62 (d, J = 9 Hz, 2H), 4.53-4.44 (m, 4H), 4.41-4.19 (m, 2H), 3.70 (s, 2H), 3.60 (d, J = 9 Hz, 6H), 3.10 (d, J = 3 Hz, 4H), 2.93 (d, J = 6 Hz, 2H), 2.89 (d, J = 30 Hz, 2H), 2.63 (d, J = 21 Hz, 2H), 2.07 (s, 1H), 1.80–1.67 (m, 1H), 1.52 (dd, J = 13.7, 8.5 Hz, 3H),

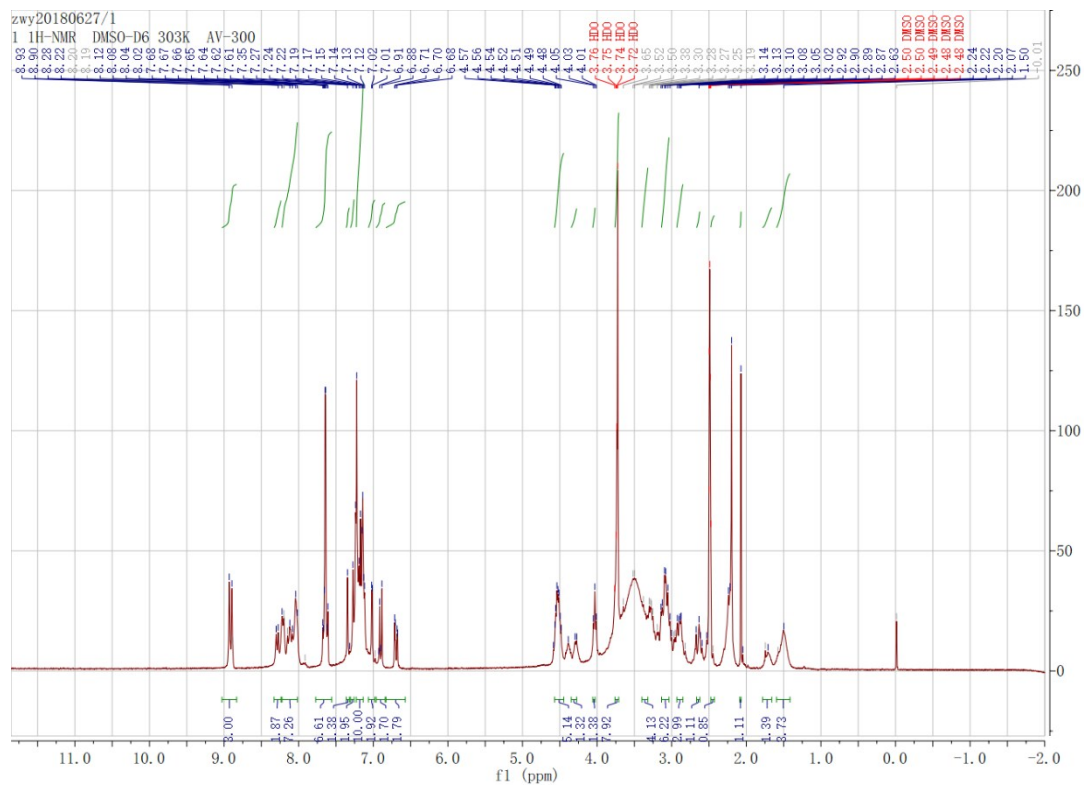

**Figure S9.**  $^1\text{H}$ NMR spectrum of 1-RGDHH (300 MHz, DMSO).

$^1\text{H}$  NMR (300 MHz, DMSO)  $\delta$  8.92 (d,  $J$  = 9 Hz, 3H), 8.29 (d,  $J$  = 6 Hz, 2H), 8.22-8.02 (m, 7H), 7.68-7.61 (m, 7H), 7.35 (s, 1H), 7.28 (s, 2H), 7.23-7.13 (m, 12H), 7.02 (d,  $J$  = 3Hz, 1H), 6.91 (dd,  $J$  = 6 Hz,  $J$  = 9 Hz, 2H), 6.69 (dd,  $J$  = 3 Hz,  $J$  = 3 Hz, 2H), 4.58-4.48 (m, 5H), 4.28 (m, 1H), 4.03 (t,  $J$  = 6 Hz, 2H), 3.76-3.72 (m, 8H), 3.14-3.02 (m, 4H), 2.48-2.42 (s, 1H), 2.07 (s, 1H), 1.80–1.67 (m, 1H), 1.52 (dd,  $J$  = 13.7, 8.5 Hz, 3H).

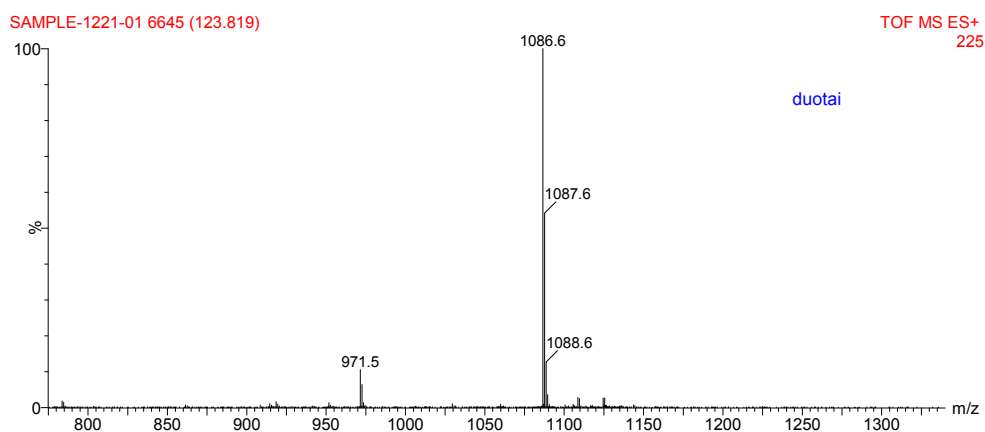

**Figure S10.** TOF-MS spectrum of 1-RGD. MS: calc.:  $[M-H] = 1086$ , obsvd.:  $[M+H] = 1086.6$ .

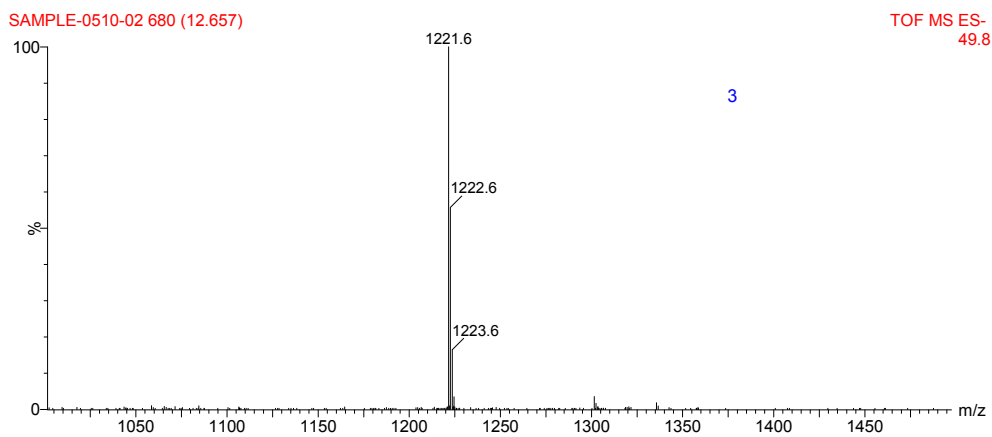

**Figure S11.** TOF-MS spectrum of 1-RGDH. MS: calc.: [M-H] = 1222, obsvd.: [M-H] = 1221.6.

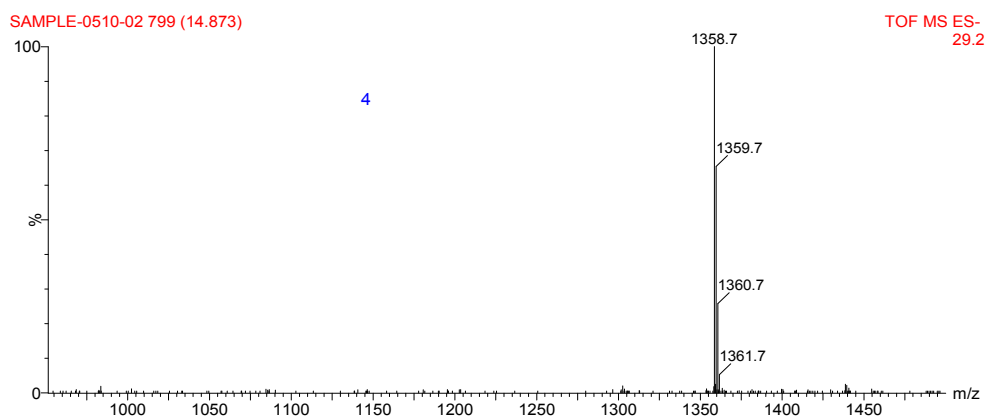

**Figure S12.** TOF-MS spectrum of 1-RGDHH. MS: calc.: [M-H] = 1359, obsvd.: [M-H] = 1358.7.

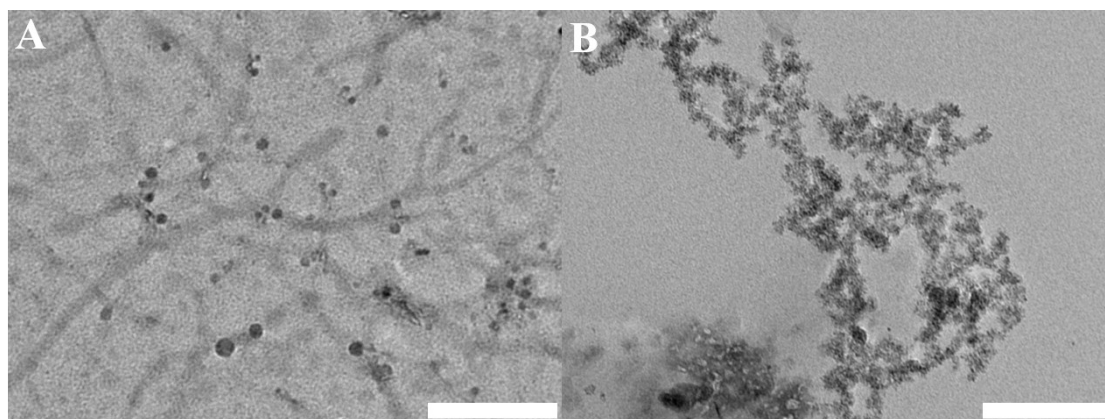

**Figure S13.** TEM images of 1-RGDH solution (1-RGDH, 0.1 wt.%; DOX, 0.1 equiv.) at pH 6.5 (A) and pH 5.5 (B). Bar, 200 nm.



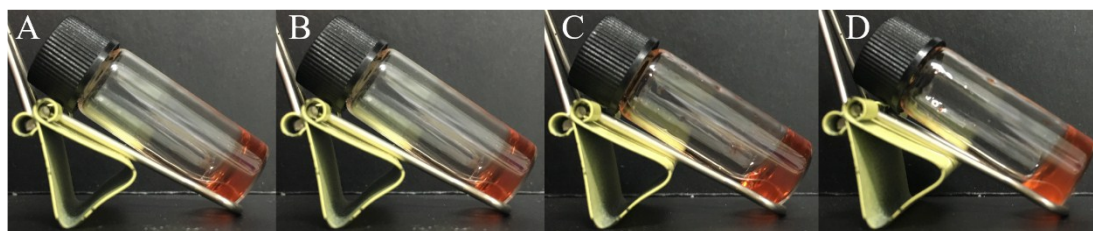

**Figure S14.** Optical images of the 1wt% 1-RGDH/DOX hydrogel before (A) and after addition of 0.4M imidazole (B), histidine (C) and EDTA (D).

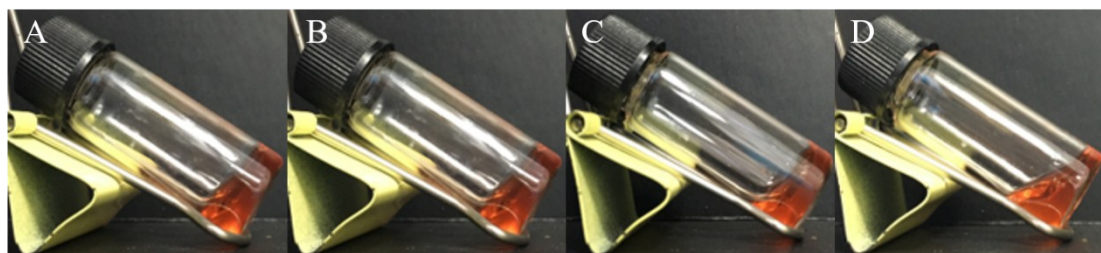

**Figure S15.** Optical images of the 1wt% 1-RGDH/DOX with 0 (A), 0.5 (B), 1 (C), and 2 (D) mol/L of NaCl.

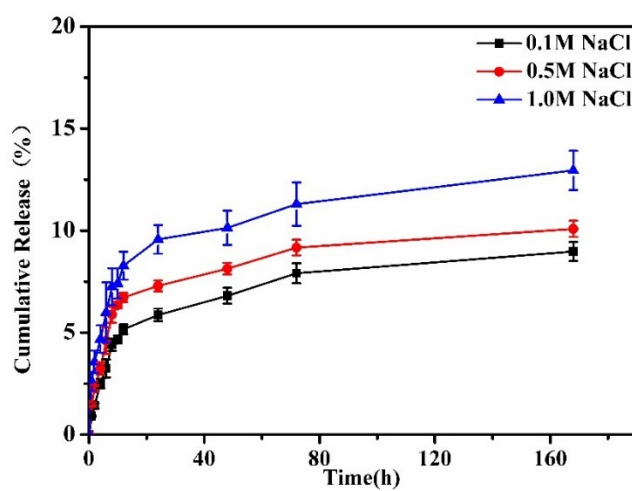

**Figure S16.** Cumulative release of doxorubicin from hydrogels at different concentration of NaCl (1-RGDH: 1 wt.%; DOX, 0.1 equiv.).

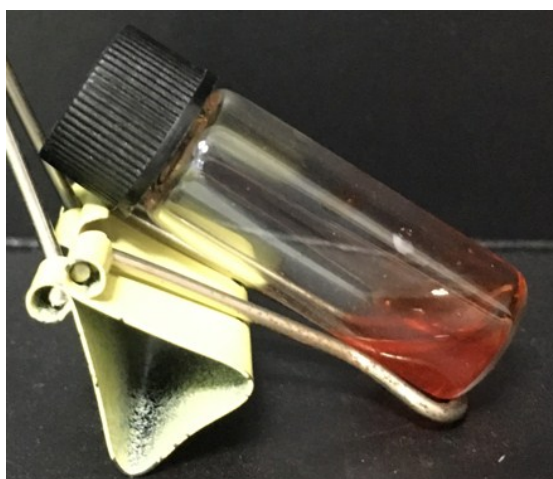



**Figure S17.** Optical images of the 1 wt.% RGD solution with 0.1. equiv. DOX.

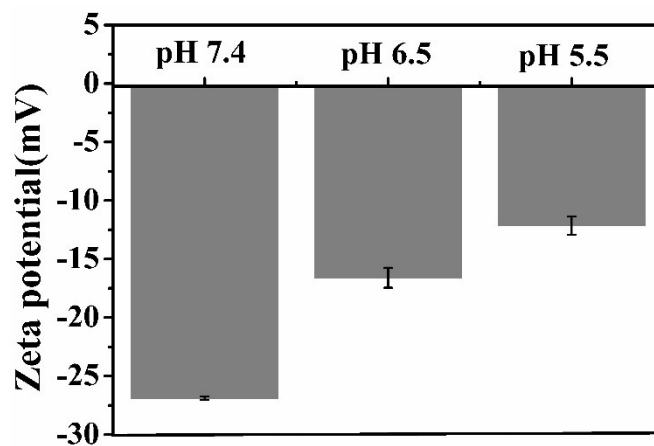

**Figure S18.** Zeta potentials of 1-RGDH solution (1-RGDH, 0.05 wt.%; DOX, 0.1 equiv.) at pH 7.4, 6.5 and 5.5.

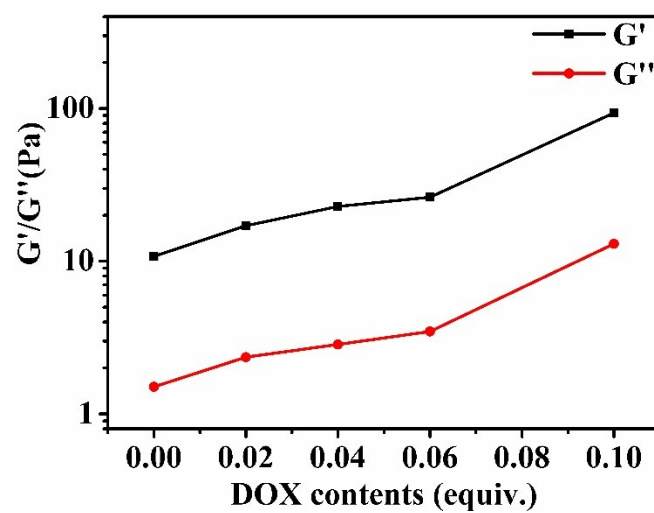

**Figure S19.** Storage moduli ( $G'$ ) and loss moduli ( $G''$ ) of 1-RGDH hydrogel with varying ratio of DOX (1-RGDH: 1 wt.%; 0 - 0.1 equiv. DOX).

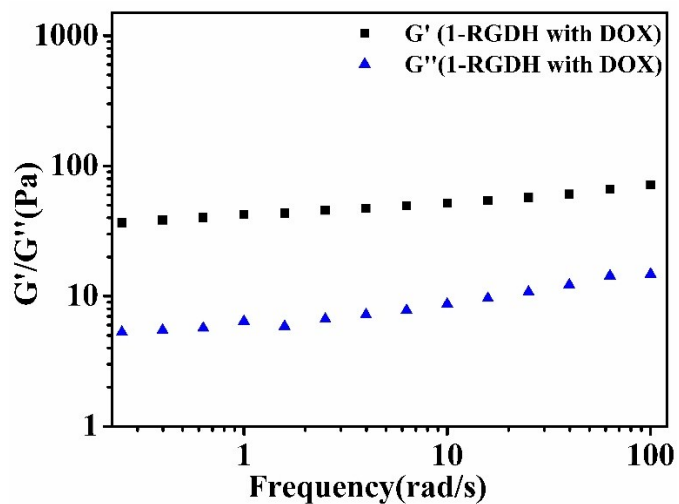

Figure S20. Dynamic frequency sweep of 1-RGDH/DOX hybrid hydrogels (1-RGDH: 1 wt.%; 0.1 equiv. DOX).

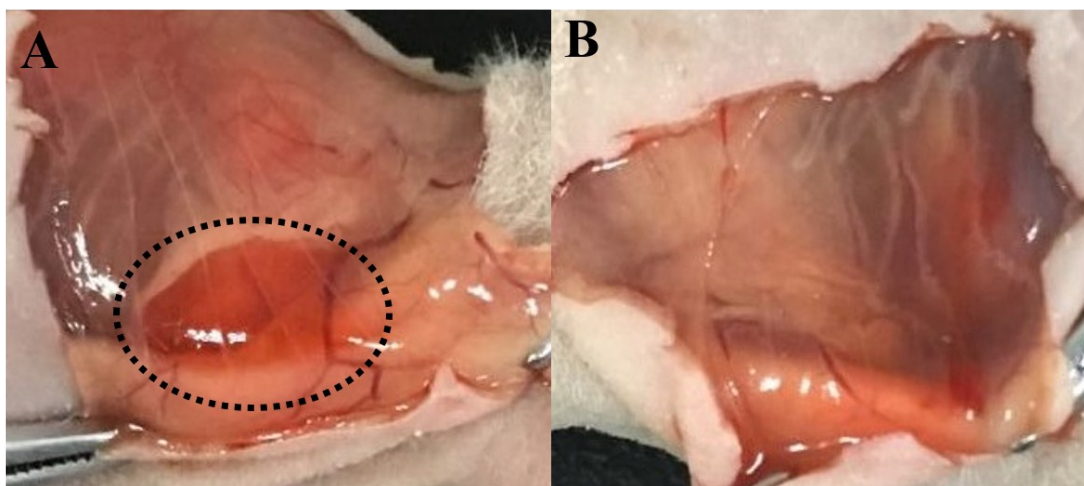

Figure S21. Subcutaneous injections of 1 wt.% 1-RGDH/DOX hydrogel (0.1 equiv. DOX) (A) and DOX solution (B).

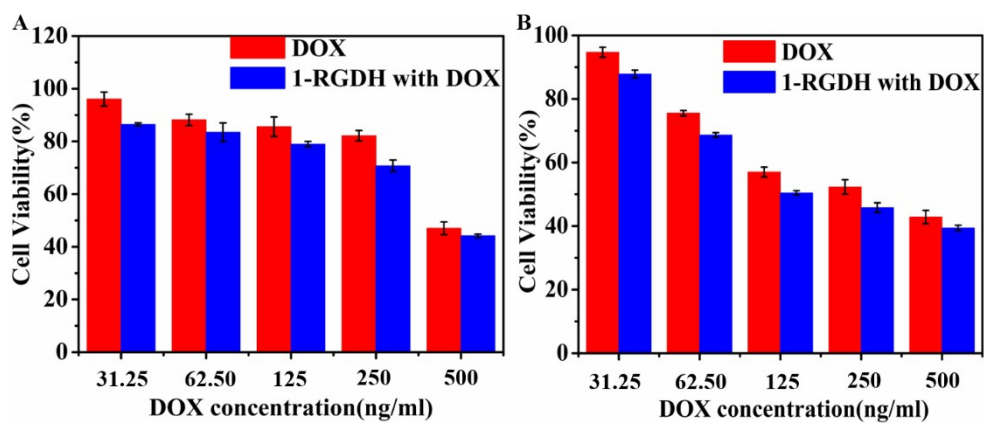

Figure S22. Cell viabilities of MCF-7 (A) and HeLa (B) after treatment of 1-RGDH/DOX or free DOX for 48 h.

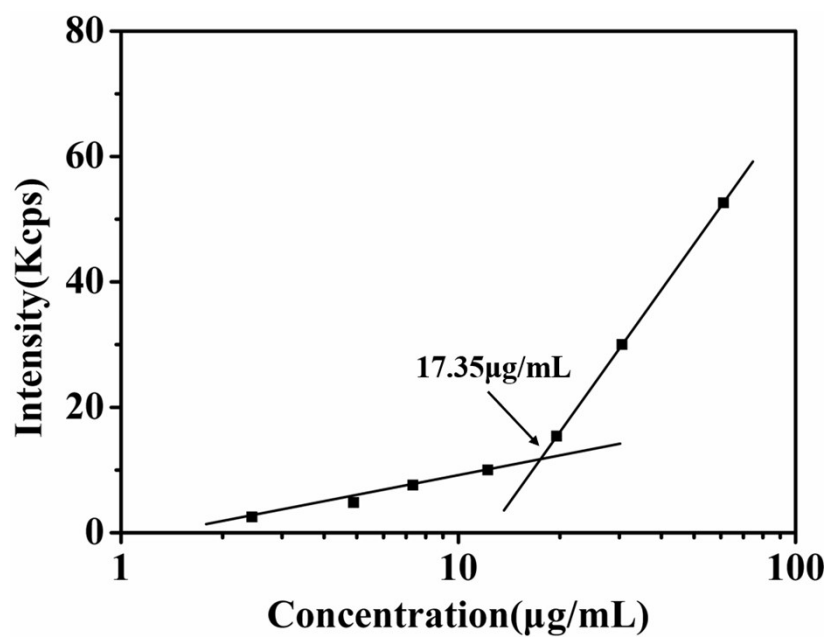

**Figure S23.** The calculation of CMC value of 1-RGDH/DOX hydrogel (1-RGDH: 1 wt.%; with 0.1 equiv. DOX).

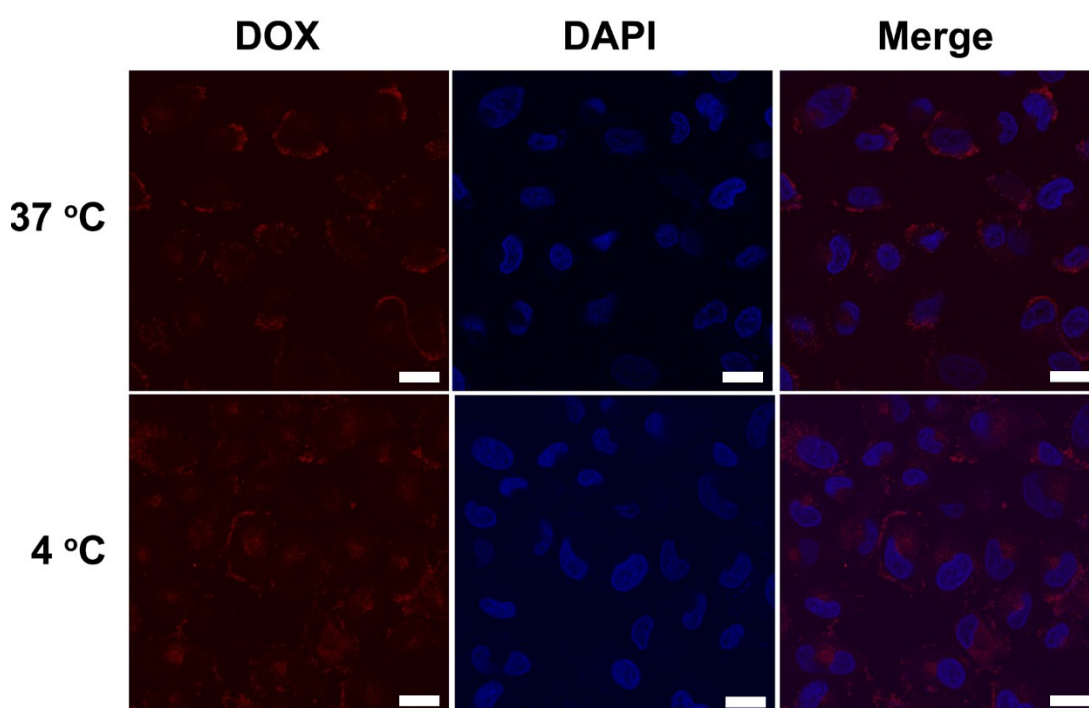

**Figure S24.** Confocal laser scanning microscopy (CLSM) images of A549 cells with incubation of aqueous solution of DOX at 37 °C or 4 °C. Red, DOX stain; blue, DAPI stain for cell nuclei. Bar, 20 µm.

**Table S1.** Table of parameters of Ritger-Peppas models for drug release behavior of 1-RGDH/DOX hydrogel at varying pH conditions (Stage I : 0-12h; Stage II : 24-168h).

|       | Stage    | k      | R <sup>2</sup> | n      |
|-------|----------|--------|----------------|--------|
| pH5.5 | Stage I  | 0.0342 | 0.9905         | 0.8084 |
|       | Stage II | 0.1374 | 0.9832         | 0.2265 |
| pH6.5 | Stage I  | 0.0185 | 0.9990         | 0.7946 |
|       | Stage II | 0.0766 | 0.9926         | 0.2039 |
| pH7.4 | Stage I  | 0.0127 | 0.9846         | 0.7768 |
|       | Stage II | 0.0471 | 0.9994         | 0.2189 |
